# Supplementary material
Source: PubMed Central journal article supplement (PMC5902383)
Supplement: NIHMS955140-supplement-Supplemental_Data.pdf [file NIHMS955140-supplement-Supplemental_Data.pdf]

# Extended depth of focus for coherence-based cellular imaging: supplementary material

BIWEI YIN,<sup>1</sup> CHULHO HYUN,<sup>1</sup> JOSEPH A. GARDECKI,<sup>1</sup> GUILLERMO J. TEARNEY<sup>1,2,3,\*</sup>

<sup>1</sup>Wellman Center for Photomedicine, Harvard Medical School and Massachusetts General Hospital, 55 Fruit Street, Boston, MA 02114, USA

<sup>2</sup>Harvard-MIT Division of Health Sciences and Technology, 77 Massachusetts Avenue, Cambridge, MA 02139, USA

<sup>3</sup>Department of Pathology, Harvard Medical School and Massachusetts General Hospital, 55 Fruit Street, Boston, MA 02114, USA

\*Corresponding author: [gtearney@partners.org](mailto:gtearney@partners.org)

Published 9 August 2017

The document provides supplementary information to “Extended depth of focus for coherence-based cellular imaging,” <https://doi.org/10.1364/optica.4.000959>. A detailed theoretical analysis on the formation of the coaxially focused multimode (CAFM) beam is provided. © 2017 Optical Society of America

<https://doi.org/10.6084/m9.figshare.5201437>

## 1. Formation of the coaxially focused multimode (CAFM) beam

Assuming the self-imaging wavefront division optical system transmits light with wavelength  $\lambda$ , the cylindrical waveguide of diameter  $d$  and a length  $L$  generates a maximum of  $M$  high order modes, the distance between multimode fiber and focusing lens is  $s$ , and the focal length of the lens is  $f$ , the direction cosine  $\cos\theta_m$  for the emitting beam of order  $m$  can be expressed as:

$$\frac{md - d/2}{\sqrt{(md - d/2)^2 + L^2}} \leq \cos(\theta_{m,m>0}) \leq \frac{md + d/2}{\sqrt{(md + d/2)^2 + L^2}}. \quad (\text{S1})$$

Since  $d \gg \lambda$ , the lens pupil function for order  $m$ ,  $P_m$  can be approximated as the geometric projection of the cylindrical waveguide's distal end aperture on the lens plane. Using the paraxial approximation, a point radiation source at the single-mode fiber's distal end generates a field  $U(r,z)$  in image space with a radial coordinate  $r$  and axial coordinate  $z$ :

$$U(r, z) = -j \frac{2\pi}{\lambda(L+s)z} e^{jk(L+s+z)} e^{j\frac{\pi}{\lambda z} r^2} \quad (\text{S2})$$

$$\int_0^\infty P_m(r_0) \left( \sum_{m=0}^M e^{j\frac{\pi(r_0+md)^2}{\lambda(L+s)}} \right) e^{-j\frac{\pi r_0^2}{\lambda f}} e^{j\frac{\pi r_0^2}{\lambda z}} J_0(2\pi r r_0 / \lambda z) r_0 dr_0.$$

where  $J_0$  is the 0<sup>th</sup> order Bessel function of the first kind. The 0<sup>th</sup> order mode provides a field  $U_0(r,z)$  that is identical to the conventional focused field as described in Eq. S3:

$$U_0(r, z) = -j \frac{2\pi}{\lambda(L+s)z} e^{jk(L+s+z)} e^{j\frac{\pi}{\lambda z} r^2} \int_0^{d(L+s)/2L} e^{j\frac{\pi r_0^2}{\lambda} A(z)} J_0(2\pi r r_0 / \lambda z) r_0 dr_0, \quad (\text{S3})$$

$$A(z) = \frac{1}{L+s} - \frac{1}{f} + \frac{1}{z}.$$

The high order modes ( $m>0$ ) introduce fields  $U_m(r,z)$ , that have ring-shaped pupil functions and phase terms linear with  $r_0$  within Fourier-Bessel integral as in Eq. S4. The total field is the coherent addition of all modes:

$$U_m(r, z) = -j \frac{2\pi}{\lambda(L+s)z} e^{jk(L+s+z)} e^{j\frac{\pi}{\lambda z} r^2} e^{j\frac{\pi m^2 d^2}{\lambda(L+s)}} \int_{r_1(m)}^{r_2(m)} \left( e^{j\frac{\pi r_0^2}{\lambda} A(z)} e^{j\frac{2\pi r_0 m d}{\lambda(L+s)}} \right) J_0(2\pi r r_0 / \lambda z) r_0 dr_0, \quad (\text{S4})$$

$$r_1(m) = mds/L - d(L+s)/2L,$$

$$r_2(m) = mds/L + d(L+s)/2L.$$

For negative  $A(z)$  (the high order modes have a focal length longer than the 0<sup>th</sup> order mode), Eq. S4 can be approximated as

$$U_m(r, z) \approx j \frac{2\pi m d}{\lambda(L+s)^2 z A(z)} e^{jk(L+s+z)} e^{j\frac{\pi}{\lambda z} r^2} e^{j\frac{\pi m^2 d^2}{\lambda(L+s)}} e^{-j\frac{\pi(md)^2}{\lambda(L+s)^2 A(z)}} \quad (\text{S5})$$

$$\int_{r_1(m)}^{r_2(m)} e^{-j\frac{\pi}{\lambda} \left( r_0 \sqrt{-A(z)} - \frac{md}{(L+s)\sqrt{-A(z)}} \right)^2} J_0(2\pi r r_0 / \lambda z) dr_0.$$

Therefore, for  $r_0=r_p$  that satisfies Eq. S6, the phase term within the Fourier-Bessel integral is canceled.

$$r_p(m) = \frac{z f m d}{(L+s-f)z - (L+s)f}, \quad (\text{S6})$$

$$r_1(m) \leq r_p(m) \leq r_2(m).$$

A focused Bessel field  $B(r, z, m)$  generated in response to  $r_p$  is expressed as:

$$B(r, z, m) = j \frac{2\pi m d}{\lambda(L+s)^2 z A(z)} e^{jk(L+s+z)} e^{j\frac{\pi}{\lambda z} r^2} e^{j\frac{\pi(md)^2}{\lambda(L+s)}} e^{-j\frac{\pi(md)^2}{\lambda(L+s)^2 A(z)}} J_0(2\pi r r_p(m) / \lambda z). \quad (\text{S7})$$

According to Eqs. S6 and S7, the radius of the first zero of Bessel field  $r_B(m, z)$  and the axial focusing region  $S(m)$  are written as Eq. S8:

$$r_B(m, z) = \frac{2.4048\lambda[(L+s-f)z - (L+s)f]}{2\pi f m d}, \quad (\text{S8})$$

$$\frac{f(2ms+L+s)}{2ms+L+s-2mf-f} \leq S(m) \leq \frac{f(2ms-L-s)}{2ms-L-s-2mf+f}.$$

A similar analysis can be applied to input sources of a different field profile such as Gaussian.
